# Supplementary material for: Unintentional drowning mortality, by age and body of water: an analysis of 60 countries
Source: PubMed Central journal article supplement — Inj Prev. 2014 Jun 18;21(e1):e43–50. doi: 10.1136/injuryprev-2013-041110 (PMC4501178; doi:10.1136/injuryprev-2013-041110), 2014-06-18
Supplement: injuryprev-2013-041110-s1.pdf [file injuryprev-2013-041110-s1.pdf]

**Supplementary file 1** Number of deaths, percentage (%) and rate (deaths per 100 000 population) of unintentional drowning by age in 60 countries

| Country, latest available three years | List* | Complete-ness | All ages |       |      | 0-4 years |      | 5-14 years |      | 15-24 years |      | 25-44 years |      | 45-64 years |      | 65+ years |      |
|---------------------------------------|-------|---------------|----------|-------|------|-----------|------|------------|------|-------------|------|-------------|------|-------------|------|-----------|------|
|                                       |       |               | Deaths   | %     | Rate | %         | Rate | %          | Rate | %           | Rate | %           | Rate | %           | Rate |           |      |
| <b>Asia Pacific, high income</b>      |       |               |          |       |      |           |      |            |      |             |      |             |      |             |      |           |      |
| Japan, 2009-11                        | 104   | 100%          | 21 108   | 100.0 | 2.7  | 0.6       | 0.8  | 1.0        | 0.6  | 1.7         | 0.9  | 4.2         | 0.9  | 13.4        | 2.8  | 78.9      | 18.9 |
| South Korea, 2009-11                  | 103   | 95%           | 2060     | 100.0 | 1.2  | 1.7       | 0.5  | 6.0        | 0.7  | 8.5         | 0.9  | 21.8        | 0.9  | 34.2        | 1.8  | 27.8      | 3.6  |
| <b>Asia, central</b>                  |       |               |          |       |      |           |      |            |      |             |      |             |      |             |      |           |      |
| Georgia, 2007,09,10                   | 104   | 81%           | 173      | 100.0 | 1.2  | 1.7       | 0.4  | 7.5        | 0.9  | 11.0        | 0.9  | 39.3        | 1.8  | 23.1        | 1.3  | 16.8      | 1.5  |
| Kazakhstan, 2008-10                   | 101   | 87%           | 3029     | 100.0 | 6.2  | 10.0      | 6.6  | 9.9        | 4.3  | 18.3        | 6.0  | 37.1        | 7.9  | 20.0        | 6.4  | 4.0       | 3.5  |
| Kyrgyzstan, 2008-10                   | 104   | 93%           | 844      | 100.0 | 5.5  | 24.4      | 12.1 | 8.9        | 2.4  | 12.2        | 2.9  | 30.0        | 5.8  | 18.1        | 6.5  | 6.4       | 7.3  |
| <b>Asia, east</b>                     |       |               |          |       |      |           |      |            |      |             |      |             |      |             |      |           |      |
| Taiwan, 2009-11                       | 103   | NA            | 1195     | 100.0 | 1.6  | 2.6       | 1.0  | 6.9        | 1.0  | 8.6         | 1.1  | 23.7        | 1.2  | 33.1        | 2.1  | 25.2      | 4.1  |
| <b>Asia, southeast</b>                |       |               |          |       |      |           |      |            |      |             |      |             |      |             |      |           |      |
| Malaysia, 2006-08                     | 103   | NA            | 928      | 100.0 | 1.1  | 11.0      | 1.4  | 31.9       | 1.8  | 21.2        | 1.2  | 24.5        | 0.9  | 9.5         | 0.7  | 1.9       | 0.5  |
| Thailand, 2004-06                     | 104   | 83%           | 13 371   | 100.0 | 7.0  | 11.9      | 11.9 | 21.7       | 9.6  | 9.3         | 3.9  | 27.1        | 5.6  | 20.2        | 6.5  | 9.6       | 8.5  |
| <b>Australasia</b>                    |       |               |          |       |      |           |      |            |      |             |      |             |      |             |      |           |      |
| Australia, 2009-11                    | 104   | 100%          | 755      | 100.0 | 1.1  | 12.1      | 2.1  | 5.6        | 0.5  | 11.9        | 1.0  | 28.9        | 1.1  | 21.6        | 1.0  | 20.0      | 1.7  |
| New Zealand, 2007-09                  | 104   | 100%          | 231      | 100.0 | 1.7  | 10.0      | 2.6  | 3.5        | 0.5  | 15.2        | 1.9  | 26.0        | 1.7  | 33.3        | 2.4  | 12.1      | 1.7  |
| <b>Caribbean</b>                      |       |               |          |       |      |           |      |            |      |             |      |             |      |             |      |           |      |
| Cuba, 2008-10                         | 104   | 97%           | 701      | 100.0 | 2.0  | 4.0       | 1.6  | 9.8        | 1.6  | 16.8        | 2.4  | 31.8        | 2.1  | 27.2        | 2.3  | 10.1      | 1.7  |
| Guyana, 2006-08                       | 104   | NA            | 184      | 100.0 | 9.2  | 12.5      | 8.2  | 7.1        | 2.3  | 19.0        | 8.6  | 30.4        | 8.3  | 22.8        | 13.9 | 8.2       | 17.7 |
| <b>Europe, central</b>                |       |               |          |       |      |           |      |            |      |             |      |             |      |             |      |           |      |
| Bulgaria, 2009-11                     | 103   | 100%          | 431      | 100.0 | 1.7  | 1.6       | 0.6  | 8.4        | 1.8  | 8.8         | 1.4  | 20.6        | 1.4  | 35.7        | 2.5  | 24.8      | 2.7  |
| Croatia, 2009-11                      | 104   | 99%           | 307      | 100.0 | 1.7  | 0.3       | 0.2  | 2.0        | 0.4  | 5.9         | 1.1  | 15.3        | 1.3  | 41.0        | 3.4  | 35.5      | 4.8  |
| Czech Republic, 2009-11               | 104   | 100%          | 613      | 100.0 | 1.6  | 2.9       | 1.0  | 2.8        | 0.6  | 8.2         | 1.3  | 23.8        | 1.5  | 36.1        | 2.6  | 26.3      | 3.3  |
| Hungary, 2009-11                      | 104   | 100%          | 551      | 100.0 | 1.5  | 1.1       | 0.4  | 4.4        | 0.8  | 10.3        | 1.5  | 21.8        | 1.3  | 37.7        | 2.6  | 22.3      | 2.5  |
| Poland, 2009-11                       | 104   | 100%          | 2726     | 100.0 | 2.1  | 1.4       | 0.6  | 2.8        | 0.7  | 12.9        | 2.2  | 25.2        | 2.0  | 43.7        | 3.8  | 14.0      | 2.4  |
| Romania, 2008-10                      | 104   | 100%          | 2678     | 100.0 | 3.9  | 2.6       | 2.1  | 9.0        | 3.7  | 12.1        | 3.6  | 22.9        | 3.0  | 32.6        | 5.5  | 20.8      | 5.8  |
| Serbia, 2009-11                       | 103   | 87%           | 261      | 100.0 | 1.1  | 1.9       | 0.5  | 9.2        | 1.1  | 11.5        | 1.1  | 17.2        | 0.8  | 34.1        | 1.4  | 25.3      | 1.8  |
| Slovakia, 2008-10                     | 104   | 100%          | 456      | 100.0 | 2.5  | 2.0       | 1.1  | 5.7        | 1.5  | 11.0        | 2.1  | 27.0        | 2.4  | 36.8        | 3.9  | 17.5      | 4.0  |

| Country, latest available three years | List* | Complete-ness | All ages |       |      | 0-4 years |      | 5-14 years |      | 15-24 years |      | 25-44 years |      | 45-64 years |      | 65+ years |      |
|---------------------------------------|-------|---------------|----------|-------|------|-----------|------|------------|------|-------------|------|-------------|------|-------------|------|-----------|------|
|                                       |       |               | Deaths   | %     | Rate | %         | Rate | %          | Rate | %           | Rate | %           | Rate | %           | Rate | %         | Rate |
| <b>Europe, east</b>                   |       |               |          |       |      |           |      |            |      |             |      |             |      |             |      |           |      |
| Belarus, 2007-09                      | 101   | 100%          | 2751     | 100.0 | 8.6  | 1.5       | 2.9  | 3.5        | 3.4  | 13.8        | 8.3  | 35.3        | 11.4 | 31.6        | 11.5 | 13.8      | 9.2  |
| Estonia, 2009-11                      | 104   | 100%          | 215      | 100.0 | 4.7  | 2.8       | 2.6  | 2.8        | 1.6  | 10.7        | 4.2  | 26.0        | 5.0  | 40.9        | 8.5  | 16.3      | 5.1  |
| Latvia, 2008-10                       | 104   | 100%          | 548      | 100.0 | 7.3  | 2.6       | 4.2  | 3.5        | 3.2  | 12.0        | 6.6  | 26.6        | 7.6  | 38.3        | 12.0 | 17.0      | 7.9  |
| Lithuania, 2008-10                    | 104   | 100%          | 943      | 100.0 | 8.5  | 2.2       | 4.4  | 4.1        | 3.8  | 10.3        | 6.3  | 26.7        | 9.0  | 41.3        | 15.4 | 15.4      | 9.0  |
| Moldova, 2009-11                      | 104   | 90%           | 673      | 100.0 | 6.0  | 2.8       | 3.3  | 8.9        | 5.0  | 11.0        | 3.8  | 28.5        | 6.0  | 38.2        | 9.5  | 10.5      | 6.6  |
| Russia, 2008-10                       | 101   | 100%          | 32 734   | 100.0 | 7.1  | 2.1       | 3.0  | 4.8        | 3.9  | 12.2        | 6.2  | 36.9        | 9.6  | 33.8        | 9.5  | 8.8       | 5.2  |
| Ukraine, 2009-11                      | 101   | 100%          | 8853     | 100.0 | 6.1  | 2.4       | 2.9  | 5.4        | 3.9  | 12.0        | 5.5  | 34.7        | 7.6  | 33.3        | 8.0  | 12.3      | 5.1  |
| <b>Europe, western</b>                |       |               |          |       |      |           |      |            |      |             |      |             |      |             |      |           |      |
| Austria, 2009-11                      | 104   | 100%          | 159      | 100.0 | 0.5  | 5.0       | 0.7  | 1.9        | 0.1  | 10.7        | 0.6  | 15.1        | 0.3  | 28.9        | 0.7  | 38.4      | 1.4  |
| Belgium, 2007-09                      | 104   | 100%          | 228      | 100.0 | 0.6  | 6.1       | 0.8  | 3.9        | 0.2  | 4.4         | 0.3  | 14.0        | 0.4  | 38.2        | 1.0  | 32.9      | 1.4  |
| Finland, 2009-11                      | 104   | 100%          | 523      | 100.0 | 2.4  | 1.1       | 0.7  | 1.1        | 0.3  | 3.8         | 1.0  | 14.1        | 1.8  | 44.0        | 5.0  | 35.8      | 6.7  |
| France, 2007-09                       | 104   | 100%          | 2994     | 100.0 | 1.3  | 4.3       | 1.1  | 2.6        | 0.3  | 6.1         | 0.8  | 16.8        | 1.0  | 33.6        | 2.1  | 36.7      | 3.5  |
| Germany, 2009-11                      | 104   | 100%          | 1172     | 100.0 | 0.4  | 6.3       | 0.7  | 4.0        | 0.2  | 6.6         | 0.3  | 13.7        | 0.2  | 26.9        | 0.5  | 42.6      | 1.0  |
| Greece, 2008-10                       | 09B   | 100%          | 1160     | 100.0 | 2.3  | 1.1       | 0.8  | 1.3        | 0.5  | 4.2         | 1.4  | 16.2        | 1.8  | 19.3        | 2.6  | 57.8      | 10.5 |
| Italy, 2008-10                        | 104   | 100%          | 1216     | 100.0 | 0.6  | 2.2       | 0.3  | 4.4        | 0.3  | 11.3        | 0.8  | 22.9        | 0.5  | 25.7        | 0.7  | 32.3      | 1.1  |
| Netherlands, 2009-11                  | 104   | 100%          | 257      | 100.0 | 0.5  | 7.4       | 0.7  | 4.3        | 0.2  | 8.9         | 0.4  | 17.5        | 0.3  | 33.5        | 0.6  | 28.4      | 0.9  |
| Norway, 2009-11                       | 104   | 100%          | 240      | 100.0 | 1.5  | 2.1       | 0.5  | 4.6        | 0.6  | 13.3        | 1.7  | 22.1        | 1.3  | 36.3        | 2.3  | 21.7      | 2.4  |
| Portugal, 2009-11                     | 104   | 100%          | 208      | 100.0 | 0.6  | 6.3       | 0.9  | 4.8        | 0.3  | 12.0        | 0.7  | 19.7        | 0.4  | 28.8        | 0.7  | 28.4      | 1.0  |
| Spain, 2008-10                        | 104   | 100%          | 1453     | 100.0 | 0.9  | 3.9       | 0.8  | 2.5        | 0.3  | 9.0         | 0.9  | 24.2        | 0.8  | 25.6        | 1.1  | 34.8      | 2.2  |
| Sweden, 2008-10                       | 104   | 100%          | 309      | 100.0 | 0.8  | 2.6       | 0.5  | 2.9        | 0.3  | 5.8         | 0.5  | 16.5        | 0.7  | 29.1        | 1.2  | 43.0      | 2.7  |
| UK, 2008-10                           | 104   | 100%          | 808      | 100.0 | 0.4  | 5.6       | 0.4  | 3.8        | 0.1  | 15.1        | 0.5  | 27.1        | 0.4  | 30.8        | 0.5  | 17.6      | 0.5  |
| <b>Latin America, Andean</b>          |       |               |          |       |      |           |      |            |      |             |      |             |      |             |      |           |      |
| Ecuador, 2008-10                      | 104   | 73%           | 1330     | 100.0 | 3.0  | 15.9      | 4.4  | 16.1       | 2.4  | 23.9        | 3.8  | 23.7        | 2.5  | 12.2        | 2.4  | 8.0       | 4.0  |
| Peru, 2005-07                         | 104   | NA            | 1404     | 100.0 | 1.7  | 18.2      | 2.9  | 12.1       | 1.0  | 20.9        | 1.8  | 23.4        | 1.3  | 15.1        | 1.7  | 10.4      | 3.1  |
| <b>Latin America, central</b>         |       |               |          |       |      |           |      |            |      |             |      |             |      |             |      |           |      |
| Colombia, 2007-09                     | 104   | 95%           | 3007     | 100.0 | 2.2  | 19.3      | 4.3  | 17.1       | 1.9  | 23.7        | 2.8  | 21.9        | 1.6  | 10.6        | 1.4  | 6.3       | 2.6  |
| Costa Rica, 2007-09                   | 104   | 93%           | 339      | 100.0 | 2.5  | 7.7       | 2.3  | 12.4       | 1.7  | 22.1        | 2.8  | 28.3        | 2.3  | 23.3        | 3.2  | 6.2       | 2.5  |

| Country, latest available three years | List* | Complete-ness | All ages |       |      | 0-4 years |      | 5-14 years |      | 15-24 years |      | 25-44 years |      | 45-64 years |      | 65+ years |      |
|---------------------------------------|-------|---------------|----------|-------|------|-----------|------|------------|------|-------------|------|-------------|------|-------------|------|-----------|------|
|                                       |       |               | Deaths   | %     | Rate | %         | Rate | %          | Rate | %           | Rate | %           | Rate | %           | Rate | %         | Rate |
| El Salvador, 2007-09                  | 104   | 75%           | 733      | 100.0 | 4.1  | 6.5       | 2.6  | 13.4       | 2.3  | 26.9        | 5.1  | 34.4        | 5.4  | 14.6        | 4.3  | 4.2       | 2.5  |
| Guatemala, 2006-08                    | 104   | 90%           | 369      | 100.0 | 1.0  | 11.4      | 0.7  | 18.7       | 0.6  | 31.7        | 1.5  | 21.4        | 0.9  | 12.5        | 1.1  | 4.3       | 0.9  |
| Mexico, 2008-10                       | 104   | 100%          | 7536     | 100.0 | 2.1  | 12.4      | 2.7  | 11.2       | 1.2  | 25.3        | 3.0  | 27.8        | 2.0  | 14.3        | 2.0  | 7.4       | 2.7  |
| Nicaragua, 2008-10                    | 104   | NA            | 523      | 100.0 | 3.2  | 5.7       | 1.5  | 10.9       | 1.4  | 30.2        | 4.3  | 35.6        | 4.0  | 13.8        | 3.5  | 3.8       | 2.6  |
| Panama, 2007-09                       | 104   | 88%           | 369      | 100.0 | 3.5  | 13.3      | 4.5  | 14.4       | 2.5  | 23.0        | 4.5  | 26.6        | 3.1  | 13.6        | 2.9  | 8.9       | 4.8  |
| Venezuela, 2005-07                    | 104   | 94%           | 1749     | 100.0 | 2.1  | 18.7      | 3.8  | 18.0       | 1.9  | 25.6        | 2.8  | 23.0        | 1.7  | 10.7        | 1.4  | 4.0       | 1.7  |
| <b>Latin America, southern</b>        |       |               |          |       |      |           |      |            |      |             |      |             |      |             |      |           |      |
| Argentina, 2008-10                    | 104   | 100%          | 1578     | 100.0 | 1.3  | 19.0      | 3.0  | 12.5       | 1.0  | 24.5        | 1.9  | 20.2        | 0.9  | 14.3        | 1.0  | 7.8       | 1.0  |
| Chile, 2007-09                        | 104   | 100%          | 1316     | 100.0 | 2.6  | 7.8       | 2.8  | 5.9        | 1.0  | 15.3        | 2.3  | 29.3        | 2.6  | 28.8        | 3.5  | 12.9      | 3.9  |
| Uruguay, 2007-09                      | 104   | 100%          | 275      | 100.0 | 2.6  | 6.5       | 2.4  | 11.3       | 2.0  | 21.5        | 3.9  | 23.6        | 2.4  | 19.6        | 2.5  | 14.9      | 3.0  |
| <b>Latin America, tropical</b>        |       |               |          |       |      |           |      |            |      |             |      |             |      |             |      |           |      |
| Brazil, 2008-10                       | 104   | 89%           | 17 633   | 100.0 | 3.0  | 8.5       | 3.2  | 14.0       | 2.4  | 22.3        | 3.9  | 31.4        | 3.1  | 17.3        | 2.8  | 4.8       | 2.2  |
| Paraguay, 2007-09                     | 104   | NA            | 406      | 100.0 | 2.2  | 11.6      | 2.1  | 14.5       | 1.4  | 30.3        | 3.2  | 24.1        | 2.0  | 15.8        | 2.4  | 3.7       | 1.6  |
| <b>North Africa/Middle East</b>       |       |               |          |       |      |           |      |            |      |             |      |             |      |             |      |           |      |
| Egypt, 2009-11                        | 103   | 100%          | 4020     | 100.0 | 1.5  | 17.2      | 2.8  | 21.3       | 1.7  | 34.8        | 2.6  | 18.2        | 1.1  | 6.5         | 0.8  | 2.0       | 0.9  |
| Turkey, 2006-08                       | 08A   | NA            | 270      | 100.0 | 0.1  | 8.1       | 0.1  | 15.9       | 0.1  | 25.6        | 0.2  | 22.6        | 0.1  | 12.2        | 0.1  | 11.5      | 0.2  |
| <b>North America, high income</b>     |       |               |          |       |      |           |      |            |      |             |      |             |      |             |      |           |      |
| Canada, 2007-09                       | 104   | 100%          | 999      | 100.0 | 0.9  | 5.4       | 1.0  | 5.7        | 0.5  | 15.7        | 1.1  | 25.3        | 0.9  | 30.3        | 1.1  | 17.5      | 1.3  |
| USA, 2008-10                          | 104   | 100%          | 11 809   | 100.0 | 1.3  | 12.4      | 2.4  | 6.3        | 0.6  | 16.1        | 1.4  | 23.7        | 1.1  | 26.6        | 1.3  | 14.8      | 1.5  |
| <b>Sub-Saharan Africa, southern</b>   |       |               |          |       |      |           |      |            |      |             |      |             |      |             |      |           |      |
| South Africa, 2007-09                 | 103   | 85%           | 3803     | 100.0 | 2.5  | 18.1      | 4.4  | 24.0       | 2.9  | 16.7        | 2.1  | 22.4        | 2.0  | 12.1        | 2.2  | 5.9       | 3.2  |

\* 08A=ICD-8 condensed List A; 09B=ICD-9 condensed Basic Tabulation List; 101=ICD-10 condensed Tabulation List 1; 103=ICD-10 detailed Three Character List; 104=ICD-10 detailed Four Character List

NA=information on completeness was not available
