# Supplementary material for: Unintentional drowning mortality, by age and body of water: an analysis of 60 countries
Source: PubMed Central journal article supplement — Inj Prev. 2014 Jun 18;21(e1):e43–50. doi: 10.1136/injuryprev-2013-041110 (PMC4501178; doi:10.1136/injuryprev-2013-041110), 2014-06-18
Supplement: injuryprev-2013-041110-s2.pdf [file injuryprev-2013-041110-s2.pdf]

**Supplementary file 2** Number and percentage of unintentional drowning deaths by body of water for 54 countries that used ICD-10 detailed 3 or 4

Character List

| Country, latest<br>available three years | Total  |       | Bathtub  |      |           |     | Swimming pool |     |           |     | Natural water |      |           |      | Other<br>specified |      | Unspecified |      |
|------------------------------------------|--------|-------|----------|------|-----------|-----|---------------|-----|-----------|-----|---------------|------|-----------|------|--------------------|------|-------------|------|
|                                          |        |       | While in |      | Fall into |     | While in      |     | Fall into |     | While in      |      | Fall into |      | No.                | %    | No.         | %    |
|                                          | No.    | %     | No.      | %    | No.       | %   | No.           | %   | No.       | %   | No.           | %    | No.       | %    |                    |      |             |      |
| <b>Asia Pacific, high income</b>         |        |       |          |      |           |     |               |     |           |     |               |      |           |      |                    |      |             |      |
| Japan, 2009-11                           | 21 108 | 100.0 | 13525    | 64.1 | 109       | 0.5 | 28            | 0.1 | 4         | 0.0 | 2720          | 12.9 | 1104      | 5.2  | 1352               | 6.4  | 2266        | 10.7 |
| South Korea, 2009-11                     | 2060   | 100.0 | 90       | 4.4  | 8         | 0.4 | 24            | 1.2 | 4         | 0.2 | 553           | 26.8 | 595       | 28.9 | 161                | 7.8  | 625         | 30.3 |
| <b>Asia, central</b>                     |        |       |          |      |           |     |               |     |           |     |               |      |           |      |                    |      |             |      |
| Georgia, 2007,09,10                      | 173    | 100.0 | 0        | 0.0  | 0         | 0.0 | 0             | 0.0 | 0         | 0.0 | 33            | 19.1 | 8         | 4.6  | 1                  | 0.6  | 131         | 75.7 |
| Kyrgyzstan, 2008-10                      | 844    | 100.0 | 0        | 0.0  | 1         | 0.1 | 6             | 0.7 | 4         | 0.5 | 330           | 39.1 | 102       | 12.1 | 22                 | 2.6  | 379         | 44.9 |
| <b>Asia, east</b>                        |        |       |          |      |           |     |               |     |           |     |               |      |           |      |                    |      |             |      |
| Taiwan, 2009-11                          | 1195   | 100.0 | 7        | 0.6  | 4         | 0.3 | 8             | 0.7 | 0         | 0.0 | 23            | 1.9  | 124       | 10.4 | 39                 | 3.3  | 990         | 82.8 |
| <b>Asia, southeast</b>                   |        |       |          |      |           |     |               |     |           |     |               |      |           |      |                    |      |             |      |
| Malaysia, 2006-08                        | 928    | 100.0 | 0        | 0.0  | 0         | 0.0 | 12            | 1.3 | 5         | 0.5 | 498           | 53.7 | 42        | 4.5  | 7                  | 0.8  | 364         | 39.2 |
| Thailand, 2004-06                        | 13371  | 100.0 | 0        | 0.0  | 0         | 0.0 | 0             | 0.0 | 3         | 0.0 | 2             | 0.0  | 45        | 0.3  | 13                 | 0.1  | 13308       | 99.5 |
| <b>Australasia</b>                       |        |       |          |      |           |     |               |     |           |     |               |      |           |      |                    |      |             |      |
| Australia, 2009-11                       | 755    | 100.0 | 32       | 4.2  | 7         | 0.9 | 66            | 8.7 | 34        | 4.5 | 260           | 34.4 | 251       | 33.2 | 23                 | 3.0  | 82          | 10.9 |
| New Zealand, 2007-09                     | 231    | 100.0 | 8        | 3.5  | 0         | 0.0 | 5             | 2.2 | 12        | 5.2 | 90            | 39.0 | 97        | 42.0 | 9                  | 3.9  | 10          | 4.3  |
| <b>Caribbean</b>                         |        |       |          |      |           |     |               |     |           |     |               |      |           |      |                    |      |             |      |
| Cuba, 2008-10                            | 701    | 100.0 | 1        | 0.1  | 0         | 0.0 | 21            | 3.0 | 3         | 0.4 | 496           | 70.8 | 52        | 7.4  | 122                | 17.4 | 6           | 0.9  |
| Guyana, 2006-08                          | 184    | 100.0 | 0        | 0.0  | 0         | 0.0 | 0             | 0.0 | 0         | 0.0 | 0             | 0.0  | 6         | 3.3  | 0                  | 0.0  | 178         | 96.7 |
| <b>Europe, central</b>                   |        |       |          |      |           |     |               |     |           |     |               |      |           |      |                    |      |             |      |
| Bulgaria, 2009-11                        | 431    | 100.0 | 2        | 0.5  | 3         | 0.7 | 3             | 0.7 | 4         | 0.9 | 78            | 18.1 | 93        | 21.6 | 32                 | 7.4  | 216         | 50.1 |
| Croatia, 2009-11                         | 307    | 100.0 | 3        | 1.0  | 2         | 0.7 | 3             | 1.0 | 0         | 0.0 | 190           | 61.9 | 19        | 6.2  | 7                  | 2.3  | 83          | 27.0 |
| Czech Republic, 2009-11                  | 613    | 100.0 | 28       | 4.6  | 6         | 1.0 | 6             | 1.0 | 7         | 1.1 | 82            | 13.4 | 137       | 22.3 | 23                 | 3.8  | 324         | 52.9 |
| Hungary, 2009-11                         | 551    | 100.0 | 18       | 3.3  | 2         | 0.4 | 6             | 1.1 | 2         | 0.4 | 310           | 56.3 | 85        | 15.4 | 110                | 20.0 | 18          | 3.3  |
| Poland, 2009-11                          | 2726   | 100.0 | 63       | 2.3  | 9         | 0.3 | 7             | 0.3 | 12        | 0.4 | 1635          | 60.0 | 502       | 18.4 | 136                | 5.0  | 362         | 13.3 |
| Romania, 2008-10                         | 2678   | 100.0 | 12       | 0.4  | 2         | 0.1 | 4             | 0.1 | 3         | 0.1 | 1143          | 42.7 | 65        | 2.4  | 74                 | 2.8  | 1375        | 51.3 |
| Serbia, 2009-11                          | 261    | 100.0 | 0        | 0.0  | 1         | 0.4 | 7             | 2.7 | 3         | 1.1 | 105           | 40.2 | 33        | 12.6 | 4                  | 1.5  | 108         | 41.4 |

| Country, latest<br>available three years | Total |       | Bathtub  |      |           |     | Swimming pool |     |           |     | Natural water |      |           |      | Other<br>specified |      | Unspecified |      |
|------------------------------------------|-------|-------|----------|------|-----------|-----|---------------|-----|-----------|-----|---------------|------|-----------|------|--------------------|------|-------------|------|
|                                          |       |       | While in |      | Fall into |     | While in      |     | Fall into |     | While in      |      | Fall into |      | No.                | %    | No.         | %    |
|                                          | No.   | %     | No.      | %    | No.       | %   | No.           | %   | No.       | %   | No.           | %    | No.       | %    | No.                | %    | No.         | %    |
| Slovakia, 2008-10                        | 456   | 100.0 | 18       | 3.9  | 2         | 0.4 | 3             | 0.7 | 1         | 0.2 | 276           | 60.5 | 90        | 19.7 | 32                 | 7.0  | 34          | 7.5  |
| <b>Europe, east</b>                      |       |       |          |      |           |     |               |     |           |     |               |      |           |      |                    |      |             |      |
| Estonia, 2009-11                         | 215   | 100.0 | 10       | 4.7  | 1         | 0.5 | 1             | 0.5 | 1         | 0.5 | 100           | 46.5 | 31        | 14.4 | 35                 | 16.3 | 36          | 16.7 |
| Latvia, 2008-10                          | 548   | 100.0 | 7        | 1.3  | 1         | 0.2 | 3             | 0.5 | 0         | 0.0 | 303           | 55.3 | 12        | 2.2  | 210                | 38.3 | 12          | 2.2  |
| Lithuania, 2008-10                       | 943   | 100.0 | 35       | 3.7  | 5         | 0.5 | 5             | 0.5 | 3         | 0.3 | 623           | 66.1 | 179       | 19.0 | 41                 | 4.3  | 52          | 5.5  |
| Moldova, 2009-11                         | 673   | 100.0 | 1        | 0.1  | 2         | 0.3 | 5             | 0.7 | 1         | 0.1 | 223           | 33.1 | 0         | 0.0  | 23                 | 3.4  | 418         | 62.1 |
| <b>Europe, western</b>                   |       |       |          |      |           |     |               |     |           |     |               |      |           |      |                    |      |             |      |
| Austria, 2009-11                         | 159   | 100.0 | 12       | 7.5  | 4         | 2.5 | 5             | 3.1 | 0         | 0.0 | 61            | 38.4 | 27        | 17.0 | 8                  | 5.0  | 42          | 26.4 |
| Belgium, 2007-09                         | 228   | 100.0 | 14       | 6.1  | 1         | 0.4 | 12            | 5.3 | 3         | 1.3 | 29            | 12.7 | 31        | 13.6 | 16                 | 7.0  | 122         | 53.5 |
| Finland, 2009-11                         | 523   | 100.0 | 8        | 1.5  | 0         | 0.0 | 8             | 1.5 | 9         | 1.7 | 163           | 31.2 | 322       | 61.6 | 4                  | 0.8  | 9           | 1.7  |
| France, 2007-09                          | 2994  | 100.0 | 48       | 1.6  | 4         | 0.1 | 52            | 1.7 | 3         | 0.1 | 318           | 10.6 | 96        | 3.2  | 31                 | 1.0  | 2442        | 81.6 |
| Germany, 2009-11                         | 1172  | 100.0 | 125      | 10.7 | 23        | 2.0 | 39            | 3.3 | 11        | 0.9 | 293           | 25.0 | 128       | 10.9 | 77                 | 6.6  | 476         | 40.6 |
| Italy, 2008-10                           | 1216  | 100.0 | 8        | 0.7  | 2         | 0.2 | 12            | 1.0 | 5         | 0.4 | 203           | 16.7 | 71        | 5.8  | 17                 | 1.4  | 898         | 73.8 |
| Netherlands, 2009-11                     | 257   | 100.0 | 14       | 5.4  | 0         | 0.0 | 9             | 3.5 | 5         | 1.9 | 25            | 9.7  | 92        | 35.8 | 7                  | 2.7  | 105         | 40.9 |
| Norway, 2009-11                          | 240   | 100.0 | 6        | 2.5  | 0         | 0.0 | 0             | 0.0 | 0         | 0.0 | 19            | 7.9  | 84        | 35.0 | 0                  | 0.0  | 131         | 54.6 |
| Portugal, 2009-11                        | 208   | 100.0 | 0        | 0.0  | 0         | 0.0 | 2             | 1.0 | 0         | 0.0 | 30            | 14.4 | 10        | 4.8  | 9                  | 4.3  | 157         | 75.5 |
| Spain, 2008-10                           | 1453  | 100.0 | 3        | 0.2  | 0         | 0.0 | 50            | 3.4 | 29        | 2.0 | 326           | 22.4 | 124       | 8.5  | 44                 | 3.0  | 877         | 60.4 |
| Sweden, 2008-10                          | 309   | 100.0 | 26       | 8.4  | 0         | 0.0 | 6             | 1.9 | 2         | 0.6 | 38            | 12.3 | 89        | 28.8 | 10                 | 3.2  | 138         | 44.7 |
| UK, 2008-10                              | 808   | 100.0 | 96       | 11.9 | 11        | 1.4 | 14            | 1.7 | 3         | 0.4 | 209           | 25.9 | 174       | 21.5 | 102                | 12.6 | 199         | 24.6 |
| <b>Latin America, Andean</b>             |       |       |          |      |           |     |               |     |           |     |               |      |           |      |                    |      |             |      |
| Ecuador, 2008-10                         | 1330  | 100.0 | 1        | 0.1  | 1         | 0.1 | 9             | 0.7 | 17        | 1.3 | 428           | 32.2 | 23        | 1.7  | 31                 | 2.3  | 820         | 61.7 |
| Peru, 2005-07                            | 1404  | 100.0 | 8        | 0.6  | 5         | 0.4 | 5             | 0.4 | 4         | 0.3 | 139           | 9.9  | 138       | 9.8  | 45                 | 3.2  | 1060        | 75.5 |
| <b>Latin America, central</b>            |       |       |          |      |           |     |               |     |           |     |               |      |           |      |                    |      |             |      |
| Colombia, 2007-09                        | 3007  | 100.0 | 2        | 0.1  | 0         | 0.0 | 95            | 3.2 | 35        | 1.2 | 1164          | 38.7 | 200       | 6.7  | 358                | 11.9 | 1153        | 38.3 |
| Costa Rica, 2007-09                      | 339   | 100.0 | 0        | 0.0  | 0         | 0.0 | 0             | 0.0 | 0         | 0.0 | 3             | 0.9  | 7         | 2.1  | 1                  | 0.3  | 328         | 96.8 |
| El Salvador, 2007-09                     | 733   | 100.0 | 0        | 0.0  | 0         | 0.0 | 0             | 0.0 | 0         | 0.0 | 0             | 0.0  | 3         | 0.4  | 0                  | 0.0  | 730         | 99.6 |
| Guatemala, 2006-08                       | 369   | 100.0 | 0        | 0.0  | 0         | 0.0 | 0             | 0.0 | 0         | 0.0 | 16            | 4.3  | 0         | 0.0  | 0                  | 0.0  | 353         | 95.7 |

| Country, latest<br>available three years | Total |       | Bathtub  |      |           |     | Swimming pool |      |           |     | Natural water |      |           |      | Other<br>specified |      | Unspecified |      |
|------------------------------------------|-------|-------|----------|------|-----------|-----|---------------|------|-----------|-----|---------------|------|-----------|------|--------------------|------|-------------|------|
|                                          |       |       | While in |      | Fall into |     | While in      |      | Fall into |     | While in      |      | Fall into |      | No.                | %    | No.         | %    |
|                                          | No.   | %     | No.      | %    | No.       | %   | No.           | %    | No.       | %   | No.           | %    | No.       | %    |                    |      |             |      |
| Mexico, 2008-10                          | 7536  | 100.0 | 2        | 0.0  | 6         | 0.1 | 81            | 1.1  | 31        | 0.4 | 1425          | 18.9 | 482       | 6.4  | 1091               | 14.5 | 4418        | 58.6 |
| Nicaragua, 2008-10                       | 523   | 100.0 | 0        | 0.0  | 0         | 0.0 | 4             | 0.8  | 1         | 0.2 | 85            | 16.3 | 8         | 1.5  | 2                  | 0.4  | 423         | 80.9 |
| Panama, 2007-09                          | 369   | 100.0 | 0        | 0.0  | 0         | 0.0 | 1             | 0.3  | 6         | 1.6 | 298           | 80.8 | 21        | 5.7  | 7                  | 1.9  | 36          | 9.8  |
| Venezuela, 2005-07                       | 1749  | 100.0 | 8        | 0.5  | 12        | 0.7 | 44            | 2.5  | 25        | 1.4 | 773           | 44.2 | 166       | 9.5  | 149                | 8.5  | 572         | 32.7 |
| <b>Latin America, southern</b>           |       |       |          |      |           |     |               |      |           |     |               |      |           |      |                    |      |             |      |
| Argentina, 2008-10                       | 1578  | 100.0 | 3        | 0.2  | 4         | 0.3 | 14            | 0.9  | 16        | 1.0 | 304           | 19.3 | 179       | 11.3 | 181                | 11.5 | 877         | 55.6 |
| Chile, 2007-09                           | 1316  | 100.0 | 0        | 0.0  | 0         | 0.0 | 0             | 0.0  | 4         | 0.3 | 36            | 2.7  | 22        | 1.7  | 15                 | 1.1  | 1239        | 94.1 |
| Uruguay, 2007-09                         | 275   | 100.0 | 0        | 0.0  | 0         | 0.0 | 1             | 0.4  | 0         | 0.0 | 0             | 0.0  | 11        | 4.0  | 0                  | 0.0  | 263         | 95.6 |
| <b>Latin America, tropical</b>           |       |       |          |      |           |     |               |      |           |     |               |      |           |      |                    |      |             |      |
| Brazil, 2008-10                          | 17633 | 100.0 | 31       | 0.2  | 27        | 0.2 | 273           | 1.5  | 129       | 0.7 | 9000          | 51.0 | 1059      | 6.0  | 573                | 3.2  | 6541        | 37.1 |
| Paraguay, 2007-09                        | 406   | 100.0 | 2        | 0.5  | 0         | 0.0 | 9             | 2.2  | 4         | 1.0 | 207           | 51.0 | 32        | 7.9  | 23                 | 5.7  | 129         | 31.8 |
| <b>North Africa/Middle East</b>          |       |       |          |      |           |     |               |      |           |     |               |      |           |      |                    |      |             |      |
| Egypt, 2009-11                           | 4020  | 100.0 | 4        | 0.1  | 5         | 0.1 | 7             | 0.2  | 5         | 0.1 | 1778          | 44.2 | 494       | 12.3 | 280                | 7.0  | 1447        | 36.0 |
| <b>North America, high income</b>        |       |       |          |      |           |     |               |      |           |     |               |      |           |      |                    |      |             |      |
| Canada, 2007-09                          | 999   | 100.0 | 96       | 9.6  | 16        | 1.6 | 54            | 5.4  | 19        | 1.9 | 297           | 29.7 | 347       | 34.7 | 43                 | 4.3  | 127         | 12.7 |
| USA, 2008-10                             | 11809 | 100.0 | 1194     | 10.1 | 90        | 0.8 | 1818          | 15.4 | 270       | 2.3 | 4291          | 36.3 | 1802      | 15.3 | 526                | 4.5  | 1818        | 15.4 |
| <b>Sub-Saharan Africa, southern</b>      |       |       |          |      |           |     |               |      |           |     |               |      |           |      |                    |      |             |      |
| South Africa, 2007-09                    | 3803  | 100.0 | 0        | 0.0  | 0         | 0.0 | 4             | 0.1  | 1         | 0.0 | 14            | 0.4  | 9         | 0.2  | 9                  | 0.2  | 3766        | 99.0 |
